# Supplementary material for: Spontaneous formation of anisotropic microrods from paraffin wax in an aqueous environment
Source: Royal Society of Chemistry journal article supplement (doi:10.1039/d1sm01515j), 2021-11-30
Supplement: d1sm01515j1.pdf [file d1sm01515j1.pdf]

## Supporting Information

# Spontaneous Formation of Anisotropic Microrods from Paraffin Wax in an Aqueous Environment

Wei Wang, Jianguo Wen, Elena Shevchenko, Xuedan Ma

### S1. EDS spectra of paraffin wax and blank silicon substrates

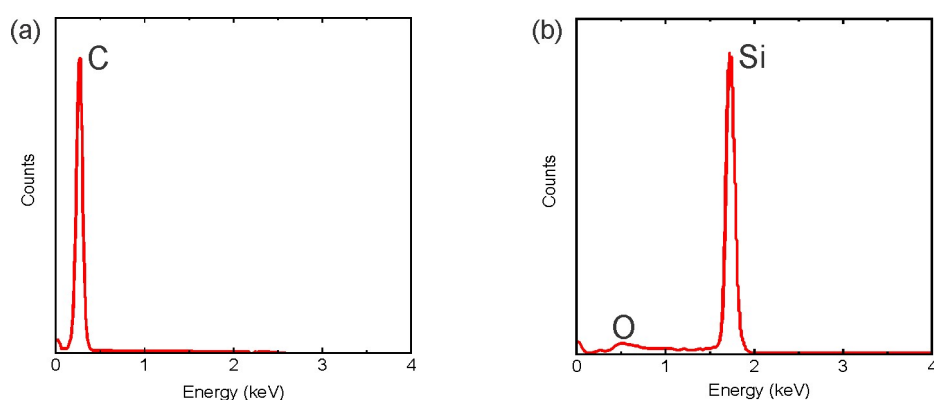

Figure S1. EDS spectra of the paraffin wax (a) and a blank silicon substrate (b).

### S2. Morphologies of the initial nanoparticles

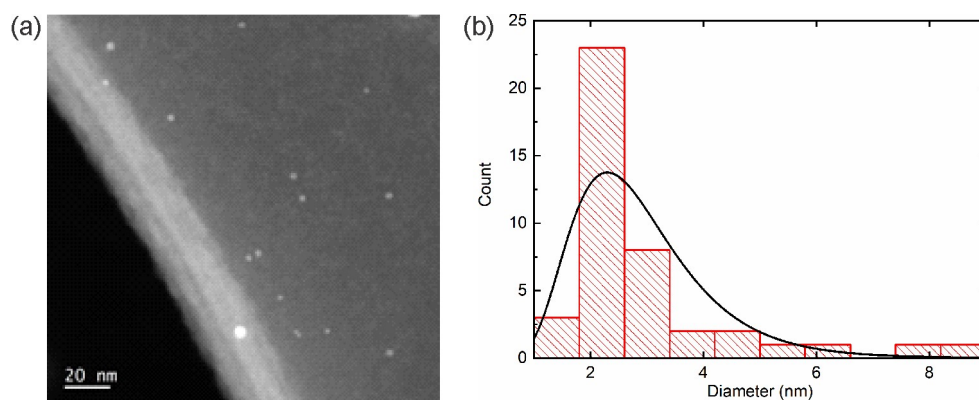

Figure S2. TEM (a) and size histograms (b) of the initial nanoparticles.

### S3. Influence of additional source materials

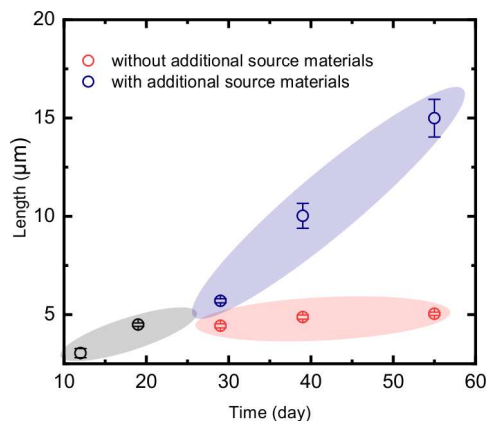

Figure S3. Influence of adding additional source materials on the growth rates of the microrods. The original growth rate of the mixture is reflected by the two black points. A significant change in the growth rate can be observed when additional source materials were added to the mixture (blue dots) compared to when no additional source materials were added (red dots).

### S4. Microrods with end-to-end morphologies

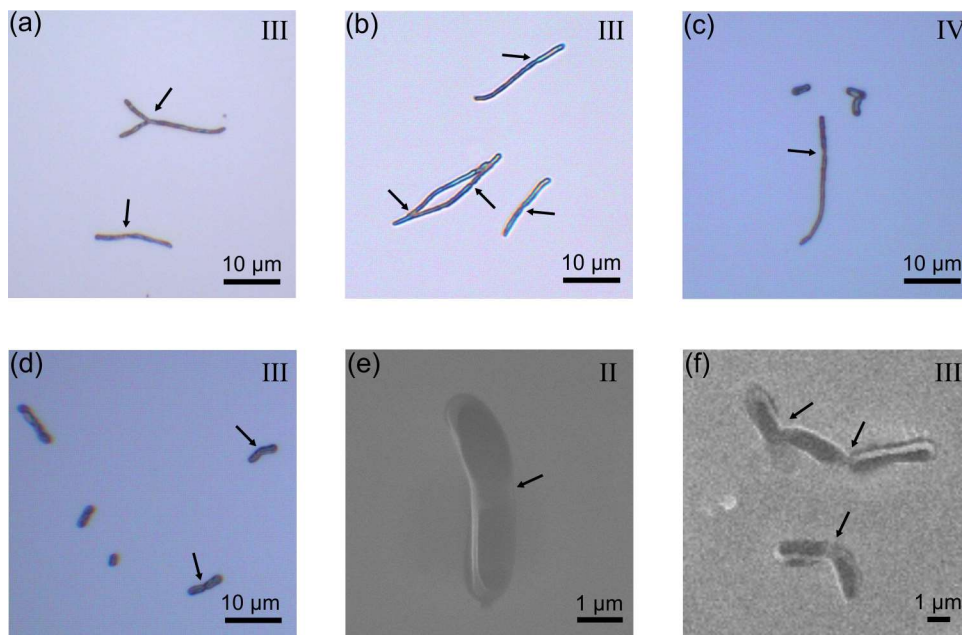

Figure S4. Optical micrographs (a - d) and SEM images (e, f) of microrods with end-to-end morphologies. The roughly estimated growth stages are indicated.
